# Supplementary material for: Safety and tolerability of canakinumab, an IL-1β inhibitor, in type 2 diabetes mellitus patients: a pooled analysis of three randomised double-blind studies
Source: PubMed Central journal article supplement (PMC4033489; doi:10.1186/1475-2840-13-94), 2014-05-17
Supplement: 1475-2840-13-94-S3.pdf [file 1475-2840-13-94-S3.pdf]

**Table A3. Incidence of any adverse events and specified abnormalities in haematology and biochemistry during any time of the post-treatment follow-up period by age subgroup and gender**

| Parameters                                   | Canakinumab pooled doses |          |           |          |                           |           |           |           |                     |           |           |           |                   |           |           |           | Placebo        |            |           |           |           |
|----------------------------------------------|--------------------------|----------|-----------|----------|---------------------------|-----------|-----------|-----------|---------------------|-----------|-----------|-----------|-------------------|-----------|-----------|-----------|----------------|------------|-----------|-----------|-----------|
|                                              | Low dose (mg/kg)         |          |           |          | Intermediate dose (mg/kg) |           |           |           | Medium dose (mg/kg) |           |           |           | High dose (mg/kg) |           |           |           |                |            |           |           |           |
|                                              | By age (years)           |          | By gender |          | By age (years)            |           | By gender |           | By age (years)      |           | By gender |           | By age (years)    |           | By gender |           | By age (years) |            | By gender |           |           |
|                                              | <65                      | ≥65      | Male      | Female   | <65                       | ≥65       | Male      | Female    | <65                 | ≥65       | Male      | Female    | <65               | ≥65       | Male      | Female    | <65            | ≥65        | Male      | Female    |           |
| Total AEs                                    | n (%)                    | 8 (47.1) | 2 (66.7)  | 3 (30.0) | 7 (70.0)                  | 86 (41.7) | 21 (51.2) | 58 (45.7) | 49 (40.8)           | 81 (38.6) | 22 (37.9) | 49 (35.5) | 54 (41.5)         | 54 (49.5) | 13 (46.4) | 32 (39.5) | 35 (62.5)      | 106 (37.2) | 28 (40.6) | 75 (36.9) | 59 (39.1) |
|                                              | IR (%)                   | 14.48    | 33.04     | 8.39     | 27.39                     | 9.8       | 12.88     | 10.41     | 10.13               | 15.53     | 21.1      | 15.46     | 17.48             | 12.89     | 9.75      | 8.71      | 18.96          | 10.76      | 15.12     | 10.47     | 12.98     |
| Total SAEs                                   | n (%)                    | 0        | 0         | 0        | 0                         | 3 (1.5)   | 1 (2.4)   | 4 (3.1)   | 0                   | 5 (2.4)   | 0         | 3 (2.2)   | 2 (1.5)           | 6 (5.5)   | 2 (7.1)   | 6 (7.4)   | 2 (3.6)        | 10 (3.5)   | 0         | 7 (3.4)   | 3 (2.0)   |
|                                              | IR (%)                   |          |           |          |                           | 0.24      | 0.34      | 0.5       |                     | 0.66      |           | 0.68      | 0.43              | 0.9       | 1.09      | 1.21      | 0.56           | 0.71       |           | 0.71      | 0.42      |
| Discontinuations due to AEs                  | n (%)                    | 0.0000   | 1 (33.3)  | 1 (10.0) | 0.0000                    | 1 (0.5)   | 0.0000    | 0.0000    | 1 (0.8)             | 0.0000    | 0.0000    | 0.0000    | 0.0000            | 1 (0.9)   | 1 (3.6)   | 0.0000    | 2 (3.6)        | 1 (0.4)    | 0.0000    | 0.0000    | 1 (0.7)   |
|                                              | IR (%)                   |          | 8.6900    | 2.2000   |                           | 0.0800    |           |           | 0.1300              |           |           |           |                   | 0.1400    | 0.5400    |           | 0.5500         | 0.0700     |           |           | 0.1400    |
| <b>Haematology</b>                           |                          |          |           |          |                           |           |           |           |                     |           |           |           |                   |           |           |           |                |            |           |           |           |
| WBC (total) any grade 1-4, n                 |                          | 0.0000   | 0.0000    | 0.0000   | 0.0000                    | 18.0000   | 1.0000    | 11.0000   | 8.0000              | 16.0000   | 2.0000    | 5.0000    | 13.0000           | 8.0000    | 2.0000    | 7.0000    | 3.0000         | 11.0000    | 3.0000    | 8.0000    | 6.0000    |
|                                              | IR (%)                   | 0.0000   | 0.0000    | 0.0000   | 0.0000                    | 2.4900    | 0.6100    | 2.5500    | 1.7600              | 3.5100    | 1.9400    | 1.8000    | 4.6300            | 1.8500    | 1.8700    | 2.2700    | 1.3000         | 1.1900     | 1.5300    | 1.2100    | 1.3000    |
|                                              | Dose trend test, P value |          |           |          |                           |           |           |           |                     | 0.0796    | 0.7443    | 0.3124    | 0.1503            |           |           |           |                |            |           |           |           |
| Absolute neutrophils, any grade 1-4, n       |                          | 1.0000   | 0.0000    | 0.0000   | 1.0000                    | 17.0000   | 4.0000    | 10.0000   | 11.0000             | 25.0000   | 2.0000    | 13.0000   | 14.0000           | 9.0000    | 4.0000    | 7.0000    | 6.0000         | 9.0000     | 1.0000    | 5.0000    | 5.0000    |
|                                              | IR (%)                   | 1.0300   | 0.0000    | 0.0000   | 1.7900                    | 2.6200    | 2.9400    | 2.6300    | 2.7200              | 5.6300    | 1.9600    | 5.0600    | 4.8400            | 3.9000    | 7.8400    | 3.9800    | 5.6600         | 1.3300     | 0.7100    | 1.0600    | 1.4400    |
|                                              | Dose trend test, P value |          |           |          |                           |           |           |           |                     | 0.0006    | 0.0591    | 0.0053    | 0.0088            |           |           |           |                |            |           |           |           |
| Platelet count (direct), any grade 1-4, n    |                          | 1.0000   | 0.0000    | 1.0000   | 0.0000                    | 10.0000   | 1.0000    | 7.0000    | 4.0000              | 8.0000    | 1.0000    | 5.0000    | 4.0000            | 4.0000    | 0.0000    | 2.0000    | 2.0000         | 7.0000     | 4.0000    | 8.0000    | 3.0000    |
|                                              | IR (%)                   | 1.0600   | 0.0000    | 2.0000   | 0.0000                    | 1.3600    | 0.6100    | 1.6100    | 0.8600              | 1.7000    | 0.9900    | 1.8200    | 1.3500            | 0.9200    | 0.0000    | 0.6300    | 0.8600         | 0.7600     | 2.1200    | 1.2500    | 0.6400    |
|                                              | Dose trend test, P value |          |           |          |                           |           |           |           |                     | 0.4689    | 0.0910    | 0.6030    | 0.4930            |           |           |           |                |            |           |           |           |
| <b>Biochemistry</b>                          |                          |          |           |          |                           |           |           |           |                     |           |           |           |                   |           |           |           |                |            |           |           |           |
| SGOT (AST) (U/L), any grade 1-4, n           |                          | 0.0000   | 0.0000    | 0.0000   | 0.0000                    | 1.0000    | 0.0000    | 0.0000    | 1.0000              | 0.0000    | 0.0000    | 0.0000    | 0.0000            | 2.0000    | 0.0000    | 0.0000    | 2.0000         | 0.0000     | 0.0000    | 0.0000    | 0.0000    |
|                                              | IR (%)                   | 0.0000   | 0.0000    | 0.0000   | 0.0000                    | 0.1300    | 0.0000    | 0.0000    | 0.2100              | 0.0000    | 0.0000    | 0.0000    | 0.0000            | 0.4400    | 0.0000    | 0.0000    | 0.8300         | 0.0000     | 0.0000    | 0.0000    | 0.0000    |
|                                              | Dose trend test, P value |          |           |          |                           |           |           |           |                     | 0.0758    | NA        | NA        | 0.0783            |           |           |           |                |            |           |           |           |
| SGPT (ALT) (U/L), any grade 1-4, n           |                          | 0.0000   | 0.0000    | 0.0000   | 0.0000                    | 2.0000    | 0.0000    | 1.0000    | 1.0000              | 4.0000    | 0.0000    | 1.0000    | 3.0000            | 4.0000    | 1.0000    | 1.0000    | 4.0000         | 2.0000     | 0.0000    | 2.0000    | 0.0000    |
|                                              | IR (%)                   | 0.0000   | 0.0000    | 0.0000   | 0.0000                    | 0.2600    | 0.0000    | 0.2200    | 0.2100              | 0.8400    | 0.0000    | 0.3600    | 1.0000            | 0.8800    | 0.8800    | 0.3000    | 1.6500         | 0.2100     | 0.0000    | 0.3000    | 0.0000    |
|                                              | Dose trend test, P value |          |           |          |                           |           |           |           |                     | 0.0358    | 0.1221    | 0.9835    | 0.0017            |           |           |           |                |            |           |           |           |
| Bilirubin (total) (umol/L), any grade 1-4, n |                          | 0.0000   | 0.0000    | 0.0000   | 0.0000                    | 0.0000    | 0.0000    | 0.0000    | 0.0000              | 3.0000    | 0.0000    | 2.0000    | 1.0000            | 3.0000    | 1.0000    | 4.0000    | 0.0000         | 6.0000     | 0.0000    | 5.0000    | 1.0000    |
|                                              | IR (%)                   | 0.0000   | 0.0000    | 0.0000   | 0.0000                    | 0.0000    | 0.0000    | 0.0000    | 0.0000              | 0.6300    | 0.0000    | 0.7100    | 0.3300            | 0.6600    | 0.8500    | 1.2600    | 0.0000         | 0.6300     | 0.0000    | 0.7500    | 0.2100    |
|                                              | Dose trend test, P value |          |           |          |                           |           |           |           |                     | 0.9610    | 0.1218    | 0.5194    | 0.7900            |           |           |           |                |            |           |           |           |

Incidence rate (IR) is expressed as % per month for AEs and % per visit for laboratory abnormalities. WBC, white blood cell; SGOT, serum glutamic oxaloacetic transaminase; SGPT, serum glutamic pyruvic transaminase.  
 Low dose: 0.03 mg/kg i.v. once; intermediate dose: 0.1 and 0.3 mg/kg i.v. once, 5 and 15 mg s.c. monthly; medium dose: 1.5 mg/kg i.v. once, 50 mg s.c. monthly and 150 mg s.c. once; high dose: 10 mg/kg i.v. once and 150 mg s.c. monthly. Total WBC count: Normal range=4.5-11.0<sup>10</sup>/L; Absolute neutrophil counts: Normal range=1.5-8.0<sup>10</sup>/L; Haemoglobin: Normal range=13.5-17.5 % (males) and 12.0-16.0 % (females); Platelet count (direct): Normal range=150-450<sup>10</sup>/L; Absolute lymphocyte count: Normal range=1.0-4.0<sup>10</sup>/L; SGOT (AST): Normal range=3-44 U/L; SGPT (ALT): Normal range=0-40 U/L; Bilirubin (total): Normal range=5-17.0 μmol/L; Alkaline phosphatase, serum: Normal range=30-125 U/L; Creatinine: Normal range=45-90 μmol/L (females) and 60-110 μmol/L (males).
